# Supplementary material
Source: publisher site journal article supplement (https://www.dovepress.com/article/420962)
Supplement: Supplementary file 1 [file get_supplementary_file.php]

**Online Supplemental Material**

**Supplemental Material S1. Missing data analysis**

The results of missing data analysis indicated that adolescents who remained in the study reported a higher level of Future time perspective than those who left the study. However, there were no significant difference between the longitudinally retained and missing individuals on any other studied variables at Time 1.

**Table S1** Missing Data Analysis

|  | Retained individuals | Missing individuals | *t* value | *p* value |
| --- | --- | --- | --- | --- |
| Communication quality | 3.13 | 3.09 | 1.19 | 0.233 |
| Past Positive time perspective | 3.81 | 3.69 | 1.72 | 0.086 |
| Past Negative time perspective | 3.17 | 3.11 | 1.00 | 0.320 |
| Present Hedonistic time perspective | 3.71 | 3.65 | 1.11 | 0.267 |
| Present Fatalistic time perspective | 2.79 | 2.84 | -0.73 | 0.467 |
| Future time perspective | 3.69 | 3.58 | 2.01 | 0.045 |

**Supplemental Material S2. Mediation analysis of the alternative model**

**Table S2** The Effects of Time Perspective on Career Maturity via Parent-adolescent Communication Quality

| Path | Standardized Estimate | 95% CI |
| --- | --- | --- |
| Direct effect |  |  |
| Past Negative → career maturity | 0.03 | [-0.10, 0.16] |
| Past Positive → career maturity | 0.03 | [-0.08, 0.15] |
| Present Hedonistic → career maturity | 0.13a | [0.02, 0.24] |
| Present Fatalistic → career maturity | -0.15a | [-0.26, -0.04] |
| Future → career maturity | 0.35a | [0.25, 0.45] |
| Specific indirect effect |  |  |
| Past Negative → communication quality → career maturity | -0.03 | [-0.10, 0.05] |
| Past Positive → communication quality → career maturity | 0.02 | [-0.02, 0.07] |
| Present Hedonistic → communication quality → career maturity | 0.002 | [-0.01, 0.03] |
| Present Fatalistic → communication quality → career maturity | -0.01 | [-0.04, 0.08] |
| Future → communication quality → career maturity | 0.01 | [-0.01, 0.05] |

**Note:**a Empirical 95% confidence interval excludes zero.

**Supplemental Material S3. Mediation model with separating communication quality with mother and father**

We separately examined the effects of communication quality with mother and father on adolescents’ career maturity through time perspective. The fitness indexes of these models were acceptable (mother: RMSEA = .028, CFI = .99, TLI = .99; father: RMSEA = .030, CFI = .99, TLI = .99) and the mediating paths in these models were similar to those in the original mediation model.

**Table S3** The Effects of Communication Quality with Mother on Career Maturity via Time Perspective

| Path | Standardized Estimate | 95% CI |
| --- | --- | --- |
| Direct effect |  |  |
| MCQ → career maturity | 0.08 | [-0.02, 0.18] |
| Total indirect effect |  |  |
| MCQ → career maturity | 0.22a | [0.12, 0.32] |
| Specific indirect effect |  |  |
| MCQ → Past Negative → career maturity | -0.01 | [-0.05, 0.04] |
| MCQ → Present Hedonistic → career maturity | 0.01 | [0.00, 0.04] |
| MCQ → Future → career maturity | 0.09 a | [0.06, 0.14] |
| MCQ → Past Positive → career maturity | 0.004 | [-0.02, 0.03] |
| MCQ → Present Fatalistic → career maturity | 0.05 a | [0.01, 0.09] |

**Note:**a Empirical 95% confidence interval excludes zero. MCQ = communication quality with mother.

**Table S4** The Effects of Communication Quality with Father on Career Maturity via Time Perspective

| Path | Standardized Estimate | 95% CI |
| --- | --- | --- |
| Direct effect |  |  |
| FCQ → career maturity | 0.04 | [-0.06, 0.15] |
| Total indirect effect |  |  |
| FCQ → career maturity | 0.20a | [0.10, 0.29] |
| Specific indirect effect |  |  |
| FCQ → Past Negative → career maturity | -0.002 | [-0.05, 0.05] |
| FCQ → Present Hedonistic → career maturity | 0.01 | [0.00, 0.04] |
| FCQ → Future → career maturity | 0.09 a | [0.06, 0.14] |
| FCQ → Past Positive → career maturity | 0.01 | [-0.02, 0.04] |
| FCQ → Present Fatalistic → career maturity | 0.05 a | [0.01, 0.09] |

**Note:**a Empirical 95% confidence interval excludes zero. FCQ = communication quality with father.
